# Supplementary material for: Regional expiratory time constants in severe respiratory failure estimated by electrical impedance tomography: a feasibility study
Source: Springer Nature journal article supplement (doi:10.1186/s13054-018-2137-3), 2018-09-19

Supplemental Figure 2

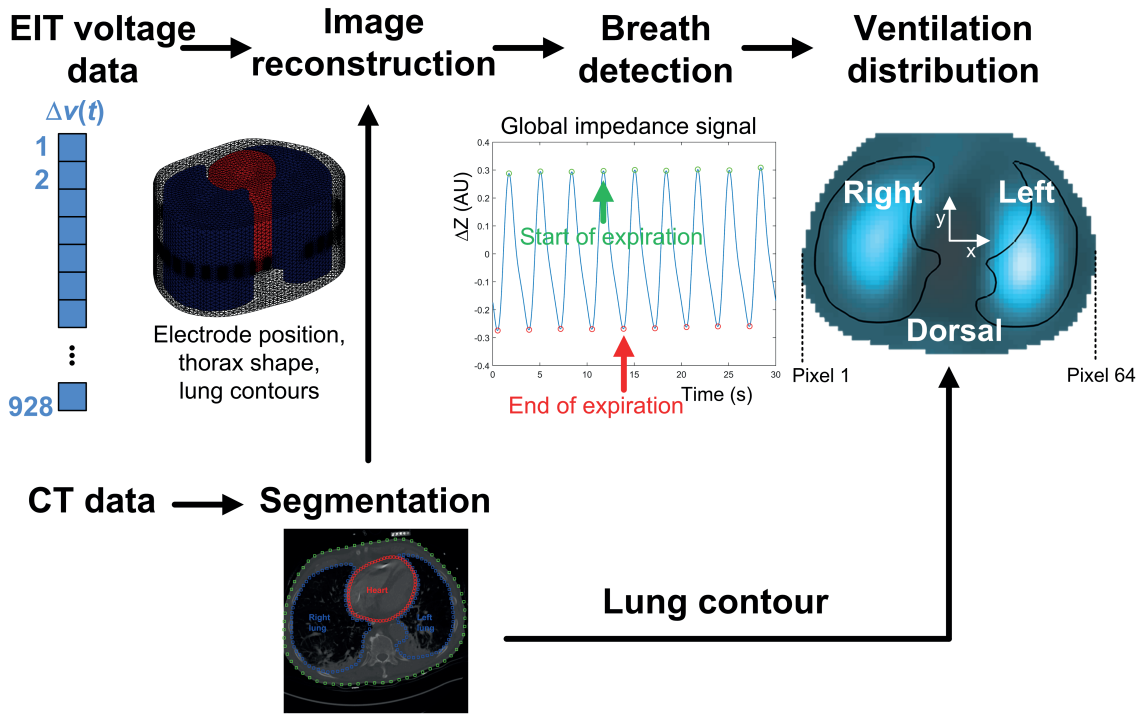

Supplement: 13054_2018_2137_MOESM1_ESM.pdf [file 13054_2018_2137_MOESM1_ESM.pdf]
